# Supplementary material for: The Glycosphingolipid, Lactosylceramide, Regulates β1-Integrin Clustering and Endocytosis
Source: Oxford University Press journal article supplement (doi:10.1158/0008-5472.can-05-0803), 2005-09-15
Supplement: 00085472can050803-sup-supp_fig2.pdf [file 00085472can050803-sup-supp_fig2.pdf]

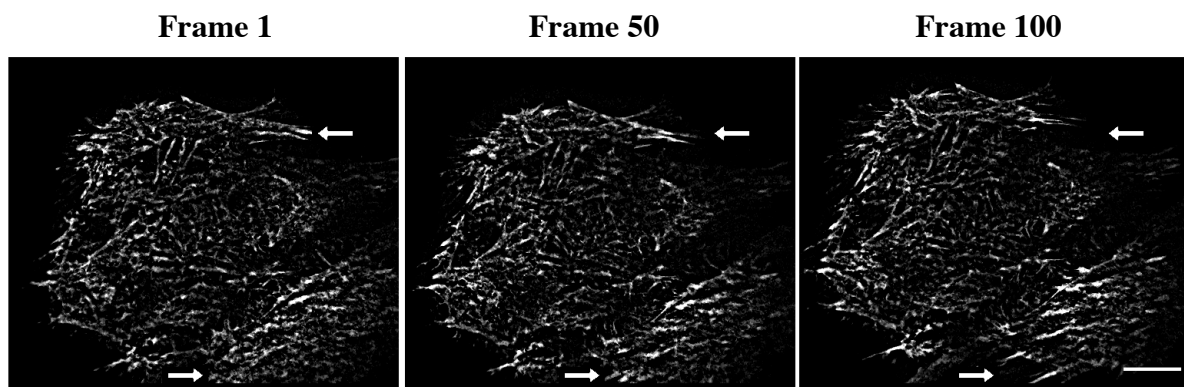

**Sharma et al. Supplemental. Fig. 2. Cells retract in response to integrin crosslinking.**

GFP-actin was expressed in cells and subsequently incubated with non-fluorescent  $\beta 1$ -integrin antibody (IgG) for 30 min at 10°C. Cells were then washed, warmed for 5 min at 37°C, and viewed by TIRF microscopy. Images were acquired every 10 secs and rendered in a Quick-Time movie (see Supplemental Data). Shown in (c) are frames 1, 50, and 100. Arrows indicate sites of cell retraction. Bar, 5  $\mu$ m.
